# Supplementary material for: Core–shell structured microneedles with programmed drug release functions for prolonged hyperuricemia management
Source: Royal Society of Chemistry journal article supplement (doi:10.1039/d3tb02607h), 2023-12-14
Supplement: d3tb02607h1.pdf [file d3tb02607h1.pdf]

**Electronic Supplementary Information (ESI)**  
**for**  
**Core-shell structured microneedles with programmed drug release**  
**functions for prolonged hyperuricemia management**

Rui Wang <sup>a,b</sup>, Yanfang Sun <sup>c,\*</sup>, Han Wang <sup>d</sup>, Tianqi Liu <sup>a,b</sup>, Amin Shavandi <sup>e</sup>, Lei Nie <sup>f</sup>, Khaydar  
E. Yunusov <sup>g</sup>, Guohua Jiang <sup>a,b,\*</sup>

<sup>a</sup> *School of Materials Science and Engineering, Zhejiang Sci-Tech University, Hangzhou,  
310018, China*

<sup>b</sup> *International Scientific and Technological Cooperation Base of Intelligent Biomaterials and  
Functional Fibers, Hangzhou, 310018, China*

<sup>c</sup> *College of Life Sciences and Medicine, Zhejiang Sci-Tech University, Hangzhou, Zhejiang,  
310018, China*

<sup>d</sup> *Wenzhou Institute, University of Chinese Academy of Sciences, Wenzhou, China*

<sup>e</sup> *BioMatter unit-École polytechnique de Bruxelles, Université Libre de Bruxelles, Brussels,  
Belgium*

<sup>f</sup> *College of Life Science, Xinyang Normal University, Xinyang 464000, China*

<sup>g</sup> *Institute of Polymer Chemistry and Physics, Uzbekistan Academy of Sciences, Tashkent,  
100128, Uzbekistan*

E-mail: katherineyfs@zstu.edu.cn (Y. Sun); ghjiang\_cn@zstu.edu.cn (G. Jiang)

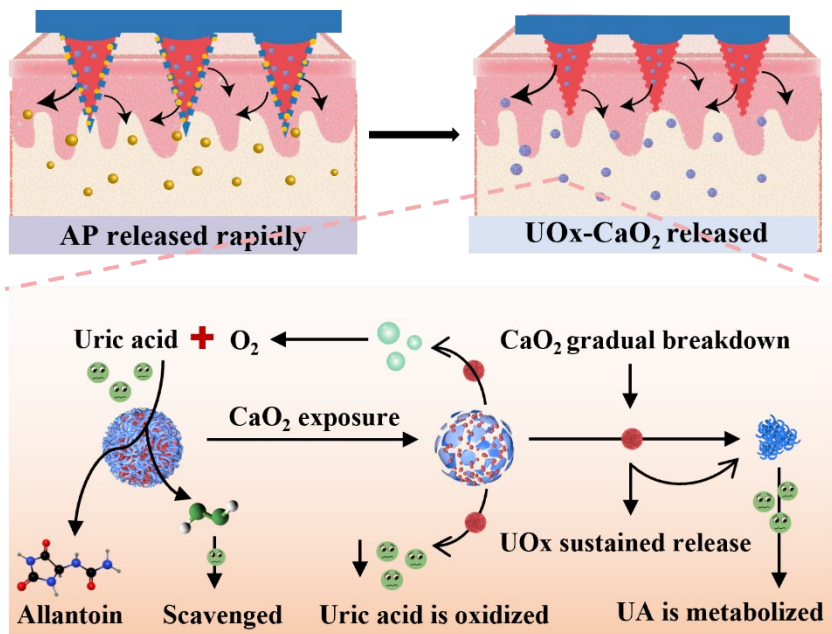

Figure S1. The release kinetics of drug's behavior *in vivo*

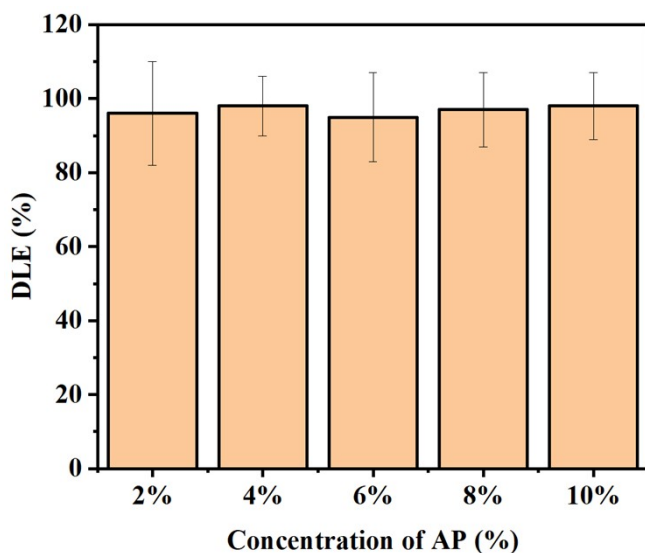

Figure S2. The drug loading efficiency of all prepared MNs

The loading amount of UOx was determined by a UV spectrophotometer at 280 nm (TU-1901, Beijing Purkinje General Instrument Co., Ltd, China). The encapsulation efficiency (EE) and loading capacity (LC) of UOx were calculated as follows:

$$EE = (W_{\text{total UOx}} - W_{\text{supernatant UOx}}) / (W_{\text{total UOx}}) \times 100\% \quad (1)$$

$$LC = (W_{\text{total UOx}} - W_{\text{supernatant UOx}}) / (W_{\text{total particle}}) \times 100\% \quad (2)$$

where  $W_{\text{total UOx}}$  is the total weight of UOx;  $W_{\text{supernatant UOx}}$  is the weight of UOx in supernatant;  $W_{\text{total particle}}$  is the weight of UOx-CaO<sub>2</sub>.

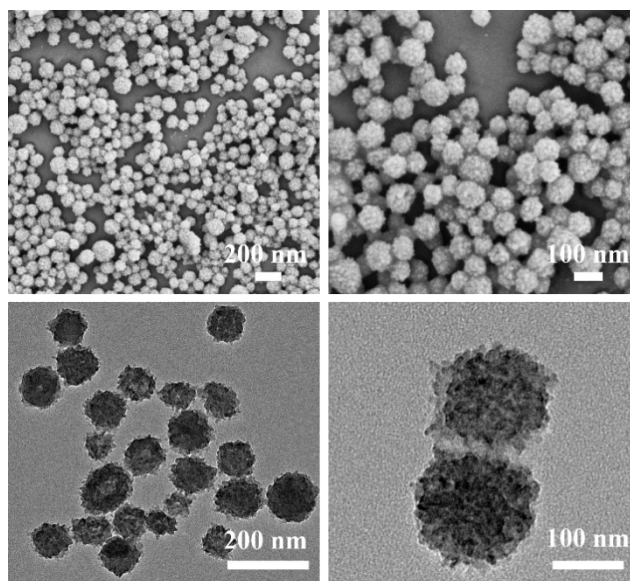

Figure S3. SEM and TEM images of CaO<sub>2</sub>.

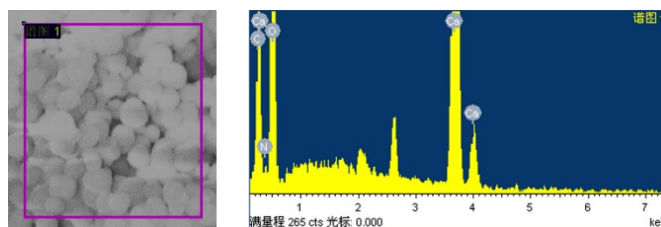

Figure S4. EDS spectrum of CaO<sub>2</sub>.

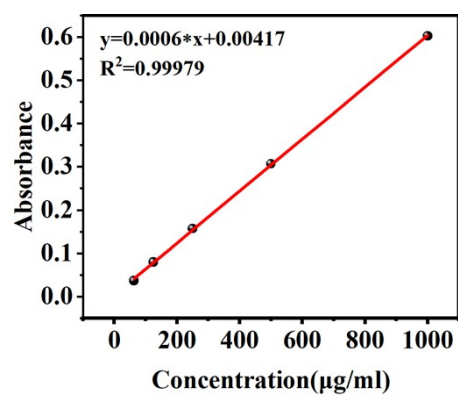

Figure S5. Standard curve of UO<sub>x</sub>.

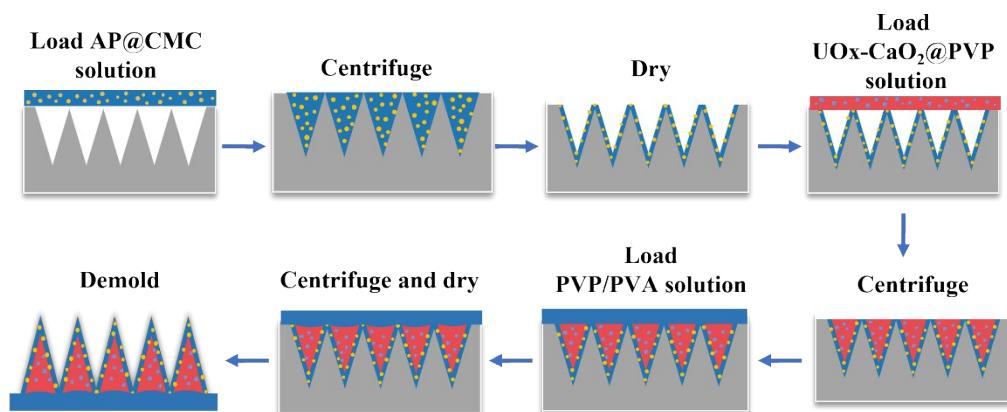

Figure S6. Schematic illustration of the fabrication of the core-shell MN patch.

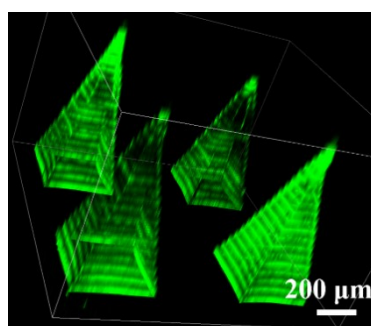

Figure S7. Confocal image of core-only MN arrays.

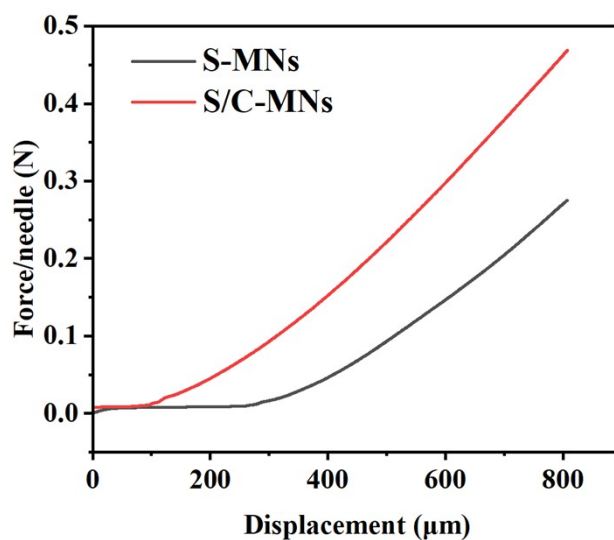

Figure S8. Force-displacement image of core-shell MNs.

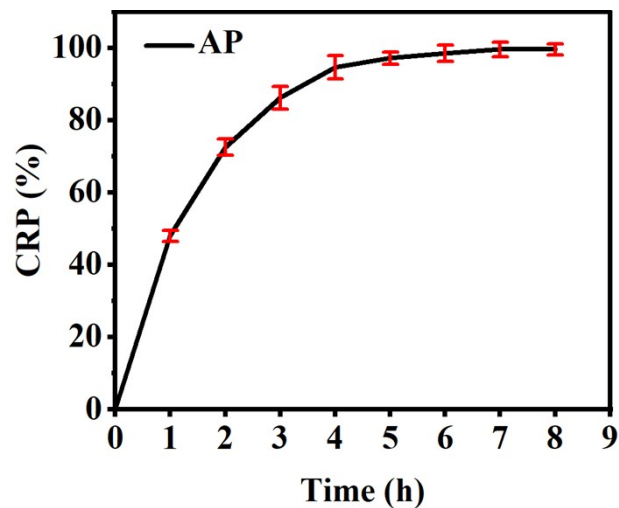

Figure S9. *In vitro* cumulative release percentage (CRP) of S/C-MNs patch

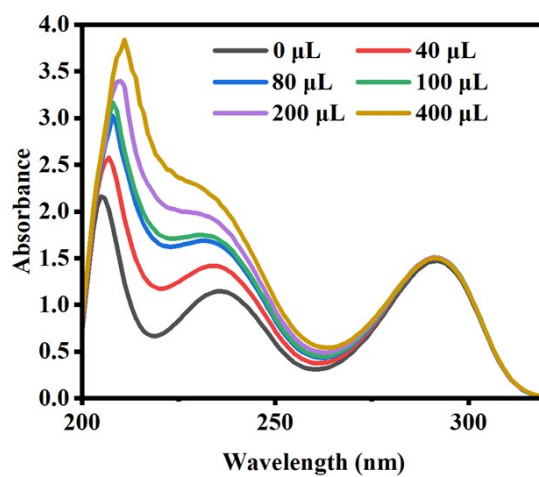

Figure S10. The UV-visible absorption spectra of UA with increased concentration of H<sub>2</sub>O<sub>2</sub>.
